# Supplementary material
Source: MDPI journal article supplement (https://www.mdpi.com/2071-1050/15/12/9312)
Supplement: s1 [file s1]

## The Dynamics of Indian Labour: Ramifications for Future of Work and Sustainability

### Supplementary Tables

**Table S1.** Variables: Label, Expansion and Definition (Penn World Data).

| Variable Name             | Variable Label | Expansion                          | Definition                                                                |
|---------------------------|----------------|------------------------------------|---------------------------------------------------------------------------|
| Labour                    | lnemp          | Logarithm of Employed              | Number of persons engaged (in millions)                                   |
| Gross Domestic Product    | lngdp          | Logarithm of Real GDP              | at constant 2017 national prices<br>(In mil. 2017US\$)                    |
| Capital                   | lncap          | Logarithm of Real Capital          | Capital stock at constant 2017 national prices (in mil. 2017US\$)         |
| Work Hours                | lnavh          | Logarithm of Average Working Hours | Average annual hours worked by persons engaged                            |
| Labour Productivity       | lnprod         | Logarithm of Labour Productivity   | $Logarithm\left(\frac{Real\ GDP}{Employed}\right)$                        |
| Capital Productivity      | lncaplab       | Logarithm of Capital per Employed  | $Logarithm\left(\frac{Real\ Capital}{Employed}\right)$                    |
| Human Capital             | hc             | Human Capital                      | Human capital index, based on years of schooling and returns to education |
| Total Factor Productivity | rtfpna         | Real Total Factor Productivity     | Total Factor Productivity at constant national prices (2017 = 1)          |

Source: based on Penn World Table 10.10 (Feenstra et al. 2015).

**Table S2.** Variables: Label, Expansion and Definition (Annual Survey of Industries).

| Variable Name                    | Variable Label       | Expansion                                                          | Definition                                                                       |
|----------------------------------|----------------------|--------------------------------------------------------------------|----------------------------------------------------------------------------------|
| Net Value Added                  | lnnva                | Logarithm of Net Value Added                                       | (Value of Output - Value of Raw Materials) - Depreciation                        |
| Fixed capital                    | lncapital            | Logarithm of Fixed Capital                                         | Value of Plant and Machinery                                                     |
| Employment                       | lnlabour             | Logarithm of Employed                                              | Directly employed personnel and contract workers                                 |
| Manager and Supervisor           | lnmanager            | Logarithm of the count of managers and supervisors                 | Supervisory and Managerial Staff                                                 |
| Direct employment                | lnworkdirect         | Logarithm of directly employed workers                             | Directly employed worker                                                         |
| Contract workers                 | lnworkcontract       | Logarithm of contract workers                                      | Workers sourced through contractor/s                                             |
| Productivity                     | lnproductivity       | Logarithm of Productivity                                          | $\frac{Net\ Value\ Added}{Employed}$                                             |
| Capital-Labour Ratio             | lncaplab             | Logarithm of Capital per employed                                  | $\frac{Fixed\ Capital}{Employed}$                                                |
| Managerial Ratio                 | manager_ratio        | Logarithm of Managers and supervisors as a proportion of Employees | $\frac{Managers\ and\ supervisors}{Employed}$                                    |
| Contract Workers Ratio           | contractlabour_ratio | Logarithm of Contract Workers as a proportion of Employees         | $\frac{Contract\ Workers}{Employed}$                                             |
| Wage Rate Ratio Managers         | lnwagem              | Logarithm of Wage Rate (Managers)                                  | $\frac{Emolument\ of\ Managers\ and\ Supervisors}{Managers\ and\ supervisors}$   |
| Wage Rate Ratio Direct Workers   | lnwaged              | Logarithm of Wage Rate (Directly Employed Workers)                 | $\frac{Emolument\ of\ Directly\ employed\ Workers}{Directly\ employed\ Workers}$ |
| Wage Rate Ratio contract workers | lnwagec              | Logarithm of Wage Rate (Contract Workers)                          | $\frac{Emolument\ of\ Contract\ Workers}{Contract\ Workers}$                     |
| Pollution Control Ratio          | lnpollutinput        | Logarithm of the Ratio of Value of Pollution                       | $\frac{Value\ of\ Pollution\ Control\ Equipment}{Value\ of\ Inputs}$             |

Control Equipment to  
Value of Inputs

Source: Based on the unit records of Annual Survey of Industries 2017-2018 .

**Table S3.** Descriptive Statistics of variables from ASI 2017-18 [Source: Author(s) computation from the unit records of Annual Survey of Industries (2017-2018)].

| Variable                         | N     | Minimum | Maximum | Mean  | Std. Deviation |
|----------------------------------|-------|---------|---------|-------|----------------|
| Value-added                      | 50459 | 2.94    | 26.76   | 16.70 | 2.16           |
| Capital                          | 54545 | 0.00    | 27.51   | 15.61 | 3.02           |
| Labour                           | 55894 | 0.00    | 11.21   | 3.89  | 1.74           |
| Count of Managers                | 49020 | 0.00    | 8.73    | 1.81  | 1.41           |
| Count of Direct Workers          | 49089 | 0.00    | 11.18   | 3.40  | 1.57           |
| Count of Contract Workers        | 19685 | 0.00    | 10.66   | 4.04  | 1.56           |
| Productivity                     | 51771 | 3.00    | 20.29   | 12.80 | 1.09           |
| Capital-Labour Ratio             | 53863 | -10.23  | 22.52   | 11.72 | 2.22           |
| Managerial Ratio                 | 49020 | 0.00    | 1.00    | 0.13  | 0.12           |
| Contract Workers Ratio           | 19685 | 0.00    | 1.00    | 0.51  | 0.26           |
| Wage Rate Ratio Managers         | 49043 | 0.00    | 23.59   | 14.76 | 2.13           |
| Wage Rate Ratio Direct Workers   | 49089 | 0.79    | 16.00   | 11.71 | 0.62           |
| Wage Rate Ratio contract workers | 19685 | -5.05   | 17.36   | 11.58 | 0.59           |
| Pollution Control Ratio          | 3453  | -24.30  | 5.19    | -6.38 | 2.93           |

**Table S4.** Weights for networks between labour, economy and technology [Source: Author(s) computation from Penn World Data 10.10].

| Network A (Weights) |        |      |         |            |             |           |
|---------------------|--------|------|---------|------------|-------------|-----------|
| Variable            | Labour | GDP  | Capital | Work Hours | Betweenness | Closeness |
| Labour              | 0.00   | 0.20 | 0.07    | 0.16       | -0.87       | -1.37     |
| GDP                 | 0.20   | 0.00 | 0.73    | 0.15       | 0.87        | 0.74      |
| Capital             | 0.07   | 0.73 | 0.00    | 0.46       | 0.87        | 0.74      |
| Work Hours          | 0.16   | 0.15 | 0.46    | 0.00       | -0.87       | -0.11     |

  

| Network B (weights)       |              |                      |               |              |                           |             |           |
|---------------------------|--------------|----------------------|---------------|--------------|---------------------------|-------------|-----------|
| Variable                  | Productivity | Capital-labour ratio | Human Capital | Labour Share | Total Factor Productivity | Betweenness | Closeness |
| Productivity              | 0.00         | 0.46                 | 0.42          | -0.09        | 0.33                      | 1.79        | 1.11      |
| Capital-labour ratio      | 0.46         | 0.00                 | 0.47          | 0.00         | 0.00                      | -0.45       | 0.39      |
| Human Capital             | 0.42         | 0.47                 | 0.00          | 0.00         | 0.20                      | -0.45       | 0.34      |
| Labour Share              | -0.09        | 0.00                 | 0.00          | 0.00         | 0.07                      | -0.45       | -1.55     |
| Total Factor Productivity | 0.33         | 0.00                 | 0.20          | 0.07         | 0.00                      | -0.45       | -0.29     |

Note: Using the estimator EBICglasso. Networks are weighted and signed. The bootstrap type is non-parametric.

**Table S5.** Occupation: categories and subcategories [Source: National Classification of Occupation 2004 (<https://labour.gov.in/sites/default/files/CodeStructure.pdf>)].

| Categories                                      | Subcategories                                                                                                                                                              |
|-------------------------------------------------|----------------------------------------------------------------------------------------------------------------------------------------------------------------------------|
| Legislators, Senior Officials and Managers      | Legislators and Senior Officials, Corporate Managers, General Managers                                                                                                     |
| Professionals                                   | Physical, Mathematical and Engineering Science Professionals, Life Science and Health Professionals, Teaching Professionals, Other Professionals                           |
| Technicians and Associate Professionals         | Physical and Engineering Science Associate Professionals, Life Science and Health Associate Professionals, Teaching Associate Professionals, Other Associate Professionals |
| Clerks                                          | Office Clerks, Customer Services Clerks                                                                                                                                    |
| Service Workers and Shop & Market Sales Workers | Personal and Protective Service Workers, Models, Sales Persons and Demonstrators                                                                                           |
| Skilled Agricultural and Fishery Workers        | Market Oriented Skilled Agricultural and Fishery Workers, Subsistence Agricultural and Fishery Workers                                                                     |

|                                            |                                                                                                                                                                                         |
|--------------------------------------------|-----------------------------------------------------------------------------------------------------------------------------------------------------------------------------------------|
| Craft and related Trades Workers           | Extraction and Building Trades Workers, Metal, Machinery and Related Trades Workers, Precision, Handicraft, Printing and Related Trades Workers, Other Craft and Related Trades Workers |
| Plant and Machine Operators and Assemblers | Stationary Plant and Related Operators, Machine Operators and Assemblers, Drivers and Mobile-Plant Operators                                                                            |
| Elementary Occupations                     | Sales and Services Elementary Occupations, Agricultural, Fishery and Related Labourers, Labourers in Mining, Construction, Manufacturing and Transport                                  |

**Table S6.** Relationship between variables and the emerging networks [Source Author(s) computation from the unit records of Annual Survey of Industries (2017-2018).

| Variables (in Rows) /<br>Networks (in Columns) | A                               | B   | C   | D   |
|------------------------------------------------|---------------------------------|-----|-----|-----|
|                                                | Membership in Networks (Yes/No) |     |     |     |
| Value-added                                    | Yes                             | Yes | No  | No  |
| Capital                                        | Yes                             | Yes | No  | No  |
| Labour                                         | Yes                             | No  | No  | No  |
| Managerial staff                               | No                              | Yes | No  | No  |
| Direct employment                              | No                              | Yes | No  | No  |
| Contract workers                               | No                              | Yes | No  | No  |
| Productivity                                   | No                              | No  | Yes | Yes |
| Capital-labour ratio                           | No                              | No  | Yes | Yes |
| Managerial staff ratio                         | No                              | No  | Yes | No  |
| Contract workers ratio                         | No                              | No  | Yes | No  |
| Wage rate managers                             | No                              | No  | No  | Yes |
| Wage rate ratio direct workers                 | No                              | No  | No  | Yes |
| Wage rate ratio contract workers               | No                              | No  | No  | Yes |

**Table S7.** Network weights for EBICglasso estimation [Source: Author(s) computation from the unit records of Annual Survey of Industries (2017-2018)].

#### Network A (Weights)

| Variable    | Labour | Capital | Value-added | Betweenness | Closeness |
|-------------|--------|---------|-------------|-------------|-----------|
| Labour      | 0.00   | 0.17    | 0.63        | -0.58       | -0.38     |
| Capital     | 0.17   | 0.00    | 0.45        | -0.58       | -0.76     |
| Value-added | 0.63   | 0.45    | 0.00        | 1.16        | 1.13      |

#### Network B (Weights)

| Variable               | Capital | Value-added | Managerial Ratio | Direct Workers Ratio | Contract Workers Ratio | Betweenness | Closeness |
|------------------------|---------|-------------|------------------|----------------------|------------------------|-------------|-----------|
| Capital                | 0.00    | 0.40        | 0.13             | 0.05                 | 0.02                   | -0.45       | -0.54     |
| Value-added            | 0.40    | 0.00        | 0.30             | 0.43                 | 0.33                   | 1.79        | 1.76      |
| Managerial Ratio       | 0.13    | 0.30        | 0.00             | 0.24                 | 0.20                   | -0.45       | -0.51     |
| Direct Workers Ratio   | 0.05    | 0.43        | 0.24             | 0.00                 | -0.04                  | -0.45       | -0.14     |
| Contract Workers Ratio | 0.02    | 0.33        | 0.20             | -0.04                | 0.00                   | -0.45       | -0.58     |

#### Network C (Weights)

| Variable     | Productivity | Capital-labour Ratio | Contract Workers Ratio | Managerial Ratio | Betweenness | Closeness |
|--------------|--------------|----------------------|------------------------|------------------|-------------|-----------|
| Productivity | 0.00         | 0.47                 | -0.18                  | 0.07             | 0.87        | 0.90      |

|                        |       |       |       |       |       |       |
|------------------------|-------|-------|-------|-------|-------|-------|
| Capital-labour Ratio   | 0.47  | 0.00  | -0.12 | 0.02  | -0.87 | -0.38 |
| Contract Workers Ratio | -0.18 | -0.12 | 0.00  | -0.18 | 0.87  | 0.72  |
| Managerial Ratio       | 0.07  | 0.02  | -0.18 | 0.00  | -0.87 | -1.24 |

#### Network D (Weights)

| Variable                         | Productivity | Wage Rate Ratio Managers | Wage Rate Ratio Direct Workers | Wage Rate Ratio contract workers | Capital-labour Ratio | Betweenness | Closeness |
|----------------------------------|--------------|--------------------------|--------------------------------|----------------------------------|----------------------|-------------|-----------|
| Productivity                     | 0.00         | 0.13                     | 0.26                           | 0.29                             | 0.36                 | 1.38        | 1.56      |
| Wage Rate Ratio Managers         | 0.13         | 0.00                     | 0.37                           | 0.24                             | 0.06                 | -0.15       | -0.73     |
| Wage Rate Ratio Direct Workers   | 0.26         | 0.37                     | 0.00                           | 0.13                             | -0.01                | 0.61        | 0.23      |
| Wage Rate Ratio contract workers | 0.29         | 0.24                     | 0.13                           | 0.00                             | 0.10                 | -0.92       | -0.06     |
| Capital-labour Ratio             | 0.36         | 0.06                     | -0.01                          | 0.10                             | 0.00                 | -0.92       | -1.00     |

Note: Using the estimator EBICglasso. Networks are weighted and signed. The bootstrap type is non-parametric.

#### Supplementary Figures

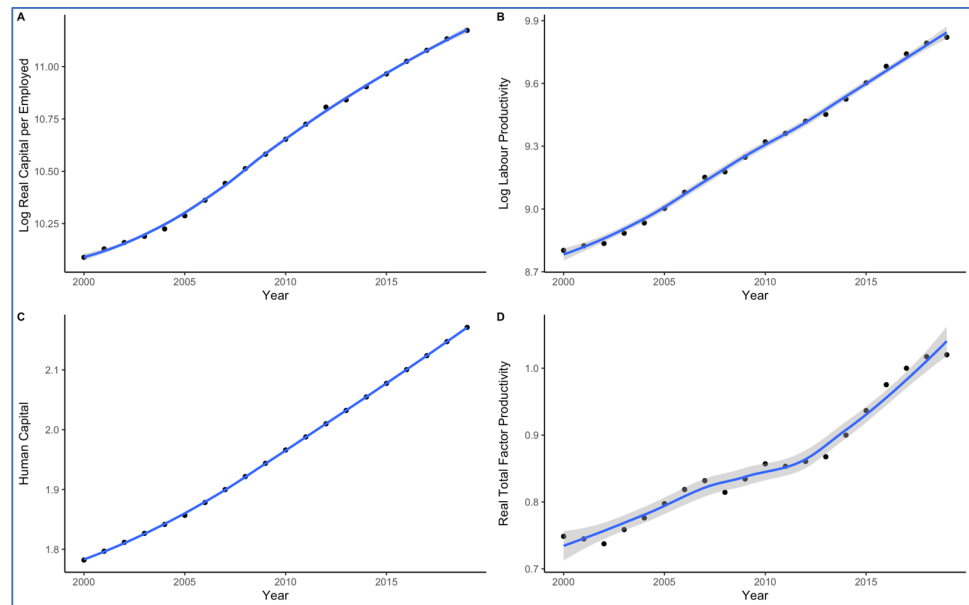

**Figure S1.** Technology, Productivity, and Human Capital during 2000-2019 [Source: Author(s) computation from Penn World Data 10.10].

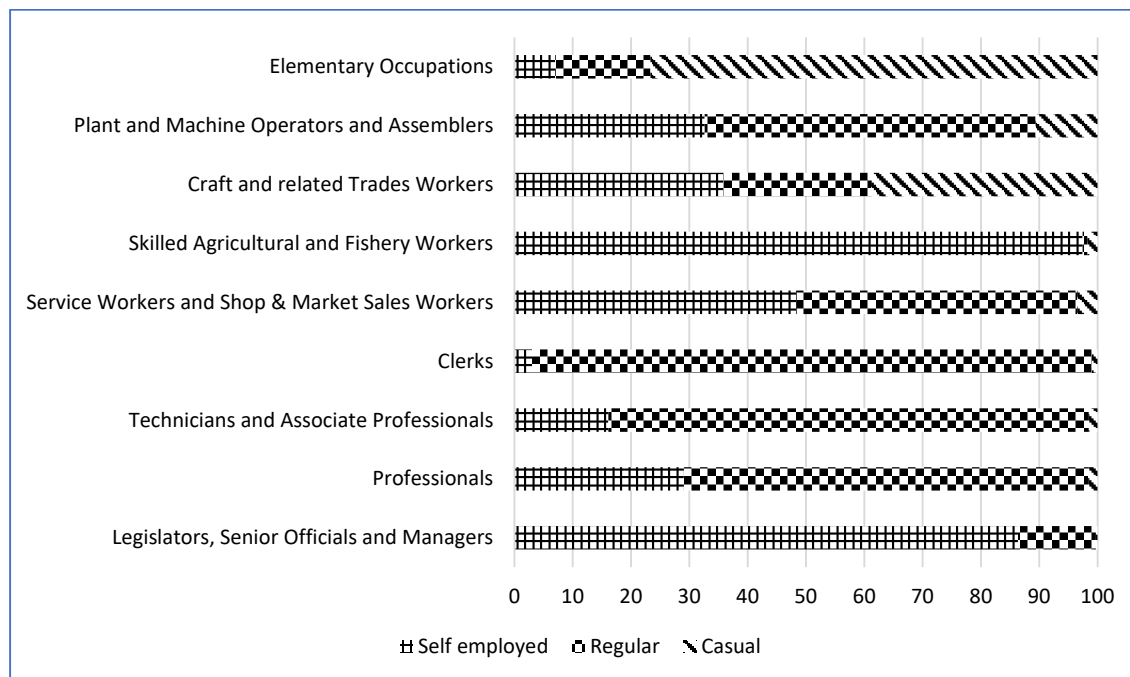

**Figure S2.** Occupations by Employment Status (in Million) 2019-20 [Source: Author(s) computation from unit records of Periodic Labour Force Survey 2019-20].

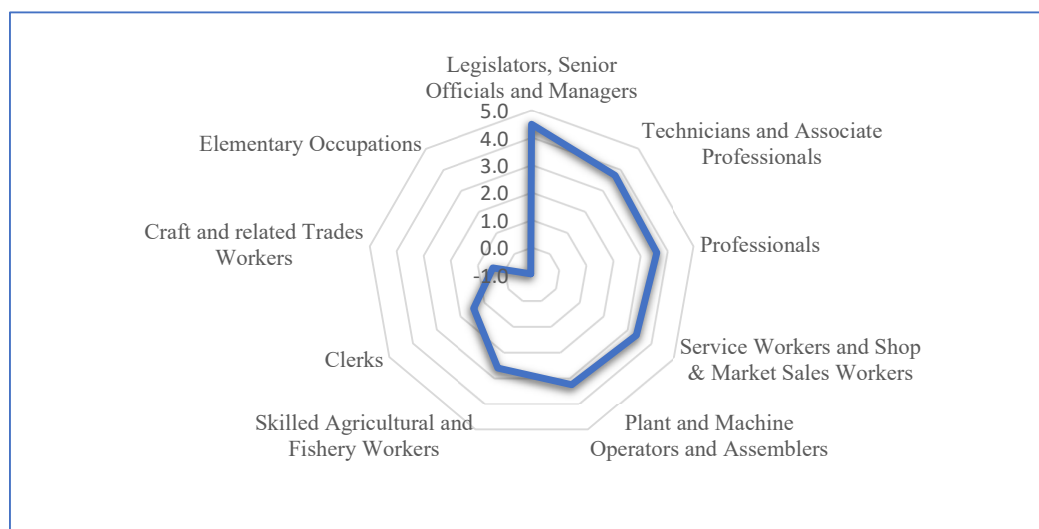

**Figure S3.** Annual growth rate (CAGR) of Occupational size during 2011-12 - 2019-20 [Source: Author(s) computation from unit records of NSS 68th Round and Periodic Labour Force Survey 2019-20].

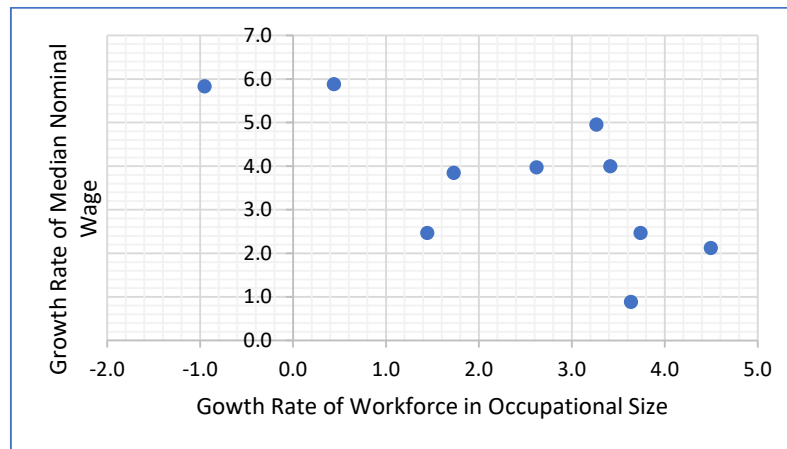

**Figure S4.** Compound annual growth rate (CAGR) of Occupational size and Growth Rate of Median Nominal Wage during 2011-12 - 2019-20 [Source: Author(s) computation from unit records of NSS 68th Round and Periodic Labour Force Survey 2019-20].

#### ISO Certification (Yes) (N = 5552)

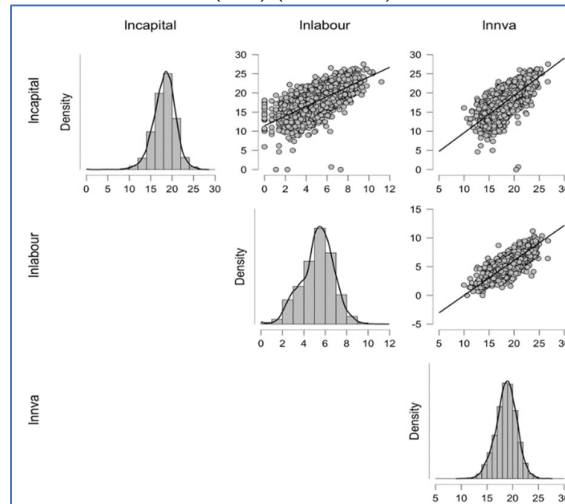

#### ISO Certification (No) (N = 48311)

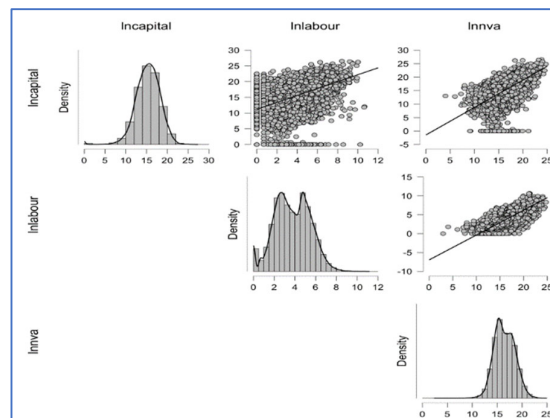

**Figure S5.** Correlational Plots and Density (Units with ISO certification) [Source: Author(s) computed from the unit records of Annual Survey of Industries 2017-2018].

## Supplementary Materials S1: Summary Statistics for Random Forest Classification

### Random Forest Classification

| Trees | Predictors per split | n(Train) | n(Validation) | n(Test) | Validation Accuracy | Test Accuracy | OOB Accuracy |
|-------|----------------------|----------|---------------|---------|---------------------|---------------|--------------|
| 85    | 1                    | 31228    | 7808          | 9758    | 0.896               | 0.898         | 0.985        |

*Note.* The model is optimized with respect to the *out-of-bag accuracy*.

### Data Split

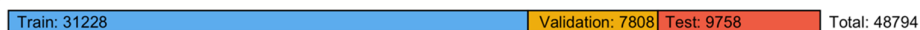

### Confusion Matrix

|          |                         | Predicted               |                        |
|----------|-------------------------|-------------------------|------------------------|
|          |                         | ISO Certification (Yes) | ISO Certification (No) |
| Observed | ISO Certification (Yes) | 121                     | 883                    |
|          | ISO Certification (No)  | 109                     | 8645                   |

### ROC Curves Plot

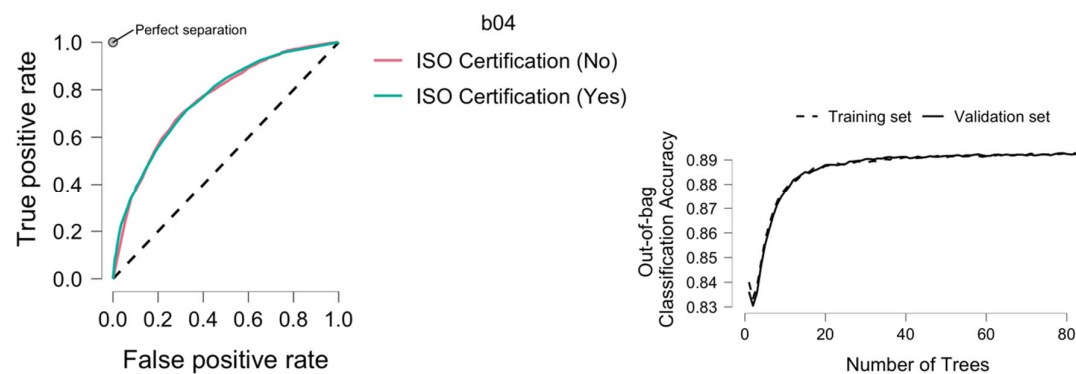

### Evaluation Metrics

|                         | Precision | Recall | F1 Score | Support | AUC   |
|-------------------------|-----------|--------|----------|---------|-------|
| ISO Certification (Yes) | 0.526     | 0.121  | 0.196    | 1004    | 0.769 |
| ISO Certification (No)  | 0.907     | 0.988  | 0.946    | 8754    | 0.765 |
| Average / Total         | 0.868     | 0.898  | 0.869    | 9758    | 0.767 |

*Note.* Area Under Curve (AUC) is calculated for every class against all other classes.
